# Supplementary material for: Antibiotic Use and Antibiotic Resistance: Public Awareness Survey in the Republic of Cyprus
Source: PubMed Central journal article supplement (PMC7692346; doi:10.3390/antibiotics9110759), 2020-10-30
Supplement: antibiotics-09-00759-s001.pdf [file antibiotics-09-00759-s001.pdf]

## ΔΗΜΟΓΡΑΦΙΚΑ ΣΤΟΙΧΕΙΑ

1. Καταγράψτε το φύλο σας
  - a. Άντρας
  - b. Γυναίκα
  
2. Ηλικία
  - a. 16-18
  - b. 19-24
  - c. 25-34
  - d. 35-44
  - e. 45-54
  - f. 55-64
  - g. 65+
  
3. Σε ποιά επαρχία ζείτε;
  - a. Λευκωσία
  - b. Λάρνακα
  - c. Λεμεσός
  - d. Πάφος
  - e. Αμμόχωστος
  
4. Ποιο από αυτά περιγράφει καλύτερα πού ζείτε;
  - a. Πόλη
  - b. Προάστιο πόλης
  - c. Αγροτική - έξω από μια πόλη π.χ. χωριό / εξοχή / περιοχή καλλιέργειας
  
5. Ποιος είναι ο υψηλότερος βαθμός ή το επίπεδο του σχολείου που έχετε ολοκληρώσει;  
Εάν είστε ήδη εγγεγραμμένοι, λαμβάνεται ως ο υψηλότερος βαθμός.
  - a. Δεν ολοκληρώθηκε καμία εκπαίδευση
  - b. Απόφοιτος δημοτικού
  - c. Απόφοιτος γυμνασίου
  - d. Απόφοιτος λυκείου
  - e. Πτυχίο πανεπιστημίου
  - f. Μεταπτυχιακό
  - g. Διδακτορικό
  
6. Ποιο από τα παρακάτω περιγράφει καλύτερα το συνολικό εισόδημα του νοικοκυριού σας, προ φόρων;
  - a. <10,000
  - b. 10,000-20,000
  - c. 20,000-30,000
  - d. >30,000

7. Ποιο από αυτά περιγράφει καλύτερα τη σύνθεση του νοικοκυριού σας
- 1 ενήλικας
  - 1 ενήλικας και τουλάχιστον 1 παιδί κάτω των 16 ετών
  - Έγγαμος/η - μόνο ενήλικες
  - Έγγαμος/η / και τουλάχιστον 1 παιδί κάτω των 16 ετών
  - Πολλά άτομα ηλικίας 16+ μόνο
  - Πολλαπλοί ενήλικες ηλικίας 16+ ετών και τουλάχιστον 1 παιδί κάτω των 16 ετών

#### ΚΥΡΙΟ ΕΡΩΤΗΜΑΤΟΛΟΓΙΟ

1. Πότε πήρατε τελευταία φορά αντιβιοτικά;
- Τον τελευταίο μήνα
  - Τους τελευταίους 6 μήνες
  - Τον τελευταίο χρόνο
  - Πάνω από ένα χρόνο πριν
  - Ποτέ
  - Δεν μπορώ να θυμηθώ

**Εάν απαντήσατε "Ποτέ", πηγαίνετε κατευθείαν στην Ερώτηση 5.**

2. Πήρατε τα αντιβιοτικά (ή μια συνταγή για αυτά) από γιατρό;
- Ναι
  - Όχι
  - Δεν μπορώ να θυμηθώ
3. Λάβατε συμβουλές από γιατρό, νοσοκόμα ή φαρμακοποιό για το πώς να τα πάρετε;
- Ναι, έλαβα συμβουλές για το πώς να τα πάρω (π.χ. με φαγητό, για 7 ημέρες)
  - Όχι
  - Δεν μπορώ να θυμηθώ
4. Απο πού πήρατε τα αντιβιοτικά;
- Φαρμακείο
  - Το διαδίκτυο
  - Φίλος ή μέλος της οικογένειας
  - Είχα φυλάξει από μια προηγούμενη φορά
  - Κάπου αλλού
  - Δεν μπορώ να θυμηθώ

## ΓΝΩΣΕΙΣ ΓΙΑ ΤΑ ΑΝΤΙΒΙΟΤΙΚΑ

5. Πότε νομίζετε ότι πρέπει να σταματήσετε να παίρνετε αντιβιοτικά όταν έχετε αρχίσει μια θεραπεία;
  - a. Όταν αισθάνεστε καλύτερα
  - b. Όταν έχετε πάρει όλα τα αντιβιοτικά σύμφωνα με τις οδηγίες
  - c. Δεν ξέρω
  
6. Πιστεύετε ότι αυτή η δήλωση είναι «αληθής» ή «ψευδής»;  
"Είναι εντάξει να χρησιμοποιείτε αντιβιοτικά που έχουν δοθεί σε έναν φίλο ή μέλος της οικογένειας, εφ' όσον αυτά χρησιμοποιήθηκαν για τη θεραπεία της ίδιας ασθένειας "
  - a. Αληθής
  - b. Ψευδής
  - c. Δεν ξέρω
  
7. Πιστεύετε ότι αυτή η δήλωση είναι «αληθής» ή «ψευδής»;  
"Είναι εντάξει να αγοράσετε τα ίδια αντιβιοτικά ή να τα ζητήσετε από γιατρό, αν είστε άρρωστοι και αυτά σας βοήθησαν να βελτιωθείτε όταν είχατε τα ίδια συμπτώματα πριν "
  - a. Αληθής
  - b. Ψευδής
  - c. Δεν ξέρω
  
8. Ποιές από αυτές τις καταστάσεις πιστεύετε πως μπορούν να αντιμετωπιστούν με αντιβιοτικά;
  - a. HIV / AIDS
  - b. Βλεννόρροια
  - c. Η λοίμωξη της ουροδόχου κύστης ή η λοίμωξη του ουροποιητικού συστήματος (UTI)
  - d. Διάρροια
  - e. Κρύωμα και γρίπη
  - f. Πυρετός
  - g. Ελονοσία
  - h. Ιλαρά
  - i. Λοίμωξη του δέρματος ή της πληγής
  - j. Πονόλαιμος
  - k. Σωματικοί πόνοι Πονοκέφαλοι

## ΓΝΩΣΕΙΣ ΓΙΑ ΤΗΝ ΑΝΤΙΒΙΟΤΙΚΗ ΑΝΤΟΧΗ

9. Έχετε ακούσει κάποιο από τους ακόλουθους όρους
  - a. Αντιβιοτική αντοχή
  - b. Αντιμικροβιακή αντοχή
  - c. Βακτήρια ανθεκτικά στα αντιβιοτικά

10. Απαντήστε εάν επιλέχθηκε η επιλογή "Αντιβιοτική αντοχή" στην ερώτηση 9.

Πού ακούσατε για τον όρο: «Αντιβιοτική αντοχή»;

- a. Γιατρός ή νοσοκόμα
- b. Φαρμακοποιός
- c. Μέλος της οικογένειας ή φίλος (συμπεριλαμβανομένων των κοινωνικών μέσων ενημέρωσης)
- d. Μέσα μαζικής ενημέρωσης (εφημερίδα, τηλεόραση, ραδιόφωνο)
- e. Ειδική καμπάνια
- f. Άλλα
- g. Δεν μπορώ να θυμηθώ

11. Απαντήστε εάν επιλέχθηκε η επιλογή «Αντιμικροβιακή αντοχή» στην ερώτηση 9.

Πού ακούσατε για τον όρο: «Αντιμικροβιακή αντοχή»;

- a. Γιατρός ή νοσοκόμα
- b. Φαρμακοποιός
- c. Μέλος της οικογένειας ή φίλος (συμπεριλαμβανομένων των κοινωνικών μέσων ενημέρωσης)
- d. Μέσα μαζικής ενημέρωσης (εφημερίδα, τηλεόραση, ραδιόφωνο)
- e. Ειδική καμπάνια
- f. Άλλα
- g. Δεν μπορώ να θυμηθώ

12. Απαντήστε εάν επιλέχθηκε η επιλογή " Βακτήρια ανθεκτικά στα αντιβιοτικά" στην ερώτηση 9.

Πού ακούσατε για τον όρο: " Βακτήρια ανθεκτικά στα αντιβιοτικά";

- a. Γιατρός ή νοσοκόμα
- b. Φαρμακοποιός
- c. Μέλος της οικογένειας ή φίλος (συμπεριλαμβανομένων των κοινωνικών μέσων ενημέρωσης)
- d. Μέσα μαζικής ενημέρωσης (εφημερίδα, τηλεόραση, ραδιόφωνο)
- e. Ειδική καμπάνια
- f. Άλλα
- g. Δεν μπορώ να θυμηθώ

13. Παρακαλείσθε να αναφέρετε εάν πιστεύετε ότι οι ακόλουθες δηλώσεις είναι «αληθείς» ή «ψευδείς»

- a. Η ανοχή στα αντιβιοτικά εμφανίζεται όταν το σώμα σας γίνεται ανθεκτικό στα αντιβιοτικά, έτσι δεν λειτουργούν σωστά. **A / Ψ**
- b. Πολλές λοιμώξεις καθίστανται όλο και περισσότερο ανθεκτικές στη θεραπεία με αντιβιοτικά **A / Ψ**
- c. Εάν τα βακτήρια είναι ανθεκτικά στα αντιβιοτικά, μπορεί να είναι πολύ δύσκολο ή αδύνατο να αντιμετωπιστούν οι λοιμώξεις που προκαλούν **A / Ψ**
- d. Η ανοχή στα αντιβιοτικά είναι ένα ζήτημα που μπορεί να επηρεάσει εμένα ή την οικογένειά μου **A / Ψ**
- e. Η ανοχή στα αντιβιοτικά είναι θέμα σε άλλες χώρες αλλά όχι εδώ **A / Ψ**
- f. Η ανοχή στα αντιβιοτικά είναι πρόβλημα μόνο για τους ανθρώπους που λαμβάνουν τακτικά αντιβιοτικά **A / Ψ**
- g. Τα βακτήρια που είναι ανθεκτικά στα αντιβιοτικά μπορούν να εξαπλωθούν από άτομο σε άτομο **A / Ψ**
- h. Οι ανθεκτικές στα αντιβιοτικά, λοιμώξεις, καθιστούν ιατρικές επεμβάσεις, όπως χειρουργική επέμβαση, μεταμοσχεύσεις οργάνων και την θεραπεία του καρκίνου, πολύ πιο επικίνδυνες **A / Ψ**

14. Πιστεύετε ότι τα αντιβιοτικά χρησιμοποιούνται ευρέως στη γεωργία (συμπεριλαμβανομένων και των ζώων που χρησιμοποιούνται για την παραγωγή τροφίμων) στη χώρα σου?

- a. Ναι
- b. Όχι
- c. Δεν ξέρω

|   |                                                                                        | Συμφωνώ<br>Πολύ | Συμφωνώ<br>Ελαφρώς | Ούτε<br>συμφωνώ<br>ούτε<br>διαφωνώ | Διαφωνώ<br>Ελαφρώς | Διαφωνώ<br>Πολύ |
|---|----------------------------------------------------------------------------------------|-----------------|--------------------|------------------------------------|--------------------|-----------------|
| 1 | Οι άνθρωποι πρέπει να χρησιμοποιούν αντιβιοτικά μόνο όταν συνταγογραφούνται από γιατρό | 5               | 4                  | 3                                  | 2                  | 1               |
| 2 | Οι αγρότες πρέπει να δίνουν λιγότερα αντιβιοτικά σε ζώα που παράγουν τρόφιμα           | 5               | 4                  | 3                                  | 2                  | 1               |
| 3 | Οι άνθρωποι δεν πρέπει να κρατούν αντιβιοτικά και να τα                                | 5               | 4                  | 3                                  | 2                  | 1               |

|   |                                                                           |   |   |   |   |   |
|---|---------------------------------------------------------------------------|---|---|---|---|---|
|   | χρησιμοποιούν αργότερα για άλλες ασθένειες                                |   |   |   |   |   |
| 4 | Οι γονείς πρέπει να εξασφαλίζουν όλους τους εμβολιασμούς των παιδιών τους | 5 | 4 | 3 | 2 | 1 |
| 5 | Οι άνθρωποι πρέπει να πλένουν τα χέρια τους τακτικά                       | 5 | 4 | 3 | 2 | 1 |
| 6 | Οι γιατροί πρέπει να συνταγογραφούν αντιβιοτικά μόνο όταν χρειάζονται     | 5 | 4 | 3 | 2 | 1 |
| 7 | Οι κυβερνήσεις θα πρέπει να επιβραβεύουν την ανάπτυξη νέων αντιβιοτικών   | 5 | 4 | 3 | 2 | 1 |
| 8 | Οι φαρμακευτικές εταιρείες πρέπει να αναπτύξουν νέα αντιβιοτικά           | 5 | 4 | 3 | 2 | 1 |

|   |                                                                                                           | Συμφωνώ<br>Πολύ | Συμφωνώ<br>Ελαφρώς | Ούτε<br>συμφωνώ<br>ούτε<br>διαφωνώ | Διαφωνώ<br>Ελαφρώς | Διαφωνώ<br>Πολύ |
|---|-----------------------------------------------------------------------------------------------------------|-----------------|--------------------|------------------------------------|--------------------|-----------------|
| 1 | Η αντοχή στα αντιβιοτικά είναι ένα από τα μεγαλύτερα προβλήματα στον κόσμο                                | 5               | 4                  | 3                                  | 2                  | 1               |
| 2 | Οι ιατροί και οι εμπειρογνώμονες θα λύσουν το πρόβλημα της αντοχής στα αντιβιοτικά πριν γίνει πολύ σοβαρό | 5               | 4                  | 3                                  | 2                  | 1               |
| 3 | Ο καθένας πρέπει να αναλάβει ευθύνη                                                                       | 5               | 4                  | 3                                  | 2                  | 1               |

|   |                                                                                                                  |   |   |   |   |   |
|---|------------------------------------------------------------------------------------------------------------------|---|---|---|---|---|
|   | χρησιμοποιώντας αντιβιοτικά υπεύθυνα                                                                             |   |   |   |   |   |
| 4 | Δεν υπάρχουν πολλά που άνθρωποι σαν εμένα μπορούν να κάνουν για να σταματήσει η αντοχή στα αντιβιοτικά           | 5 | 4 | 3 | 2 | 1 |
| 5 | Ανησυχώ για τον αντίκτυπο που η αντοχή στα αντιβιοτικά θα έχει πάνω στην υγεία μου και αυτή της οικογένειάς μου  | 5 | 4 | 3 | 2 | 1 |
| 6 | Εφόσον λαμβάνω τα αντιβιοτικά μου σωστά, δεν είμαι σε κίνδυνο να προσβληθώ από ανθεκτική στα αντιβιοτικά λοίμωξη | 5 | 4 | 3 | 2 | 1 |

Σας δίνω την άδειά μου να επικοινωνήσετε μαζί μου στο μέλλον για να ξανακάνω αυτό το ερωτηματολόγιο.-

E-mail:

Τηλέφωνο:
